# Supplementary material for: Diversity and community structure of microzooplankton in the eastern Indian Ocean during the inter-monsoon period
Source: Frontiers journal article supplement (doi:10.3389/fmars.2023.1249281), 2023-11-15
Supplement: Table_1.docx [file Table_1.docx]

**Table S1.** Species traits (LOD, lorica oral diameter, LL, lorica length, ML, model length, MW, model width (μm), AV, average volume (μm3)) of microzooplankton in the eastern Indian Ocean.

| **Species** | **Trait of species** | | | **Species** | **Trait of species** | | |
| --- | --- | --- | --- | --- | --- | --- | --- |
| **Tintinnids** | **LOD** | **LL** | **AV** | **Tintinnids** | **LOD** | **LL** | **AV** |
| ***Codonaria*** |  |  |  | ***Protorhabdonella*** |  |  |  |
| *C. mucronata* | 44-59 | 76-80 | 138818 | *P. simplex* | 26-38 | 43-56 | 13124 |
| *C. lata* | 50-54 | 76-85 | 137301 | *P. curta* | 23-28 | 36-42 | 6479 |
| ***Codonella*** |  |  |  | ***Rhabdonella*** |  |  |  |
| *C. acuta* | 52-68 | 79-88 | 141628 | *R. amor* | 36-46 | 73-86 | 33131 |
| *C. apicata* | 37-50 | 57-67 | 82944 | *R. elegans* | 50-62 | 196-233 | 73352 |
| *C. cuspidata* | 57-63 | 80-96 | 157155 | *R. exilis* | 23-30 | 50-68 | 7988 |
| *C. nationalis* | 46-55 | 73-83 | 154101 | *R. sanyahensis* | 34-44 | 106-132 | 33037 |
| ***Tintinnopsis*** |  |  |  | *R. conica* | 60-73 | 278-450 | 177297 |
| *T. radix* | 40-44 | 190-198 | 197569 | *R. cornucopia* | 42-45 | 110-130 | 45066 |
| ***Poroecus*** |  |  |  | *R. poculum* | 41-47 | 80-88 | 42553 |
| *P. curtus* | 22-29 | 46-57 | 26898 | *R. hebe* | 50-69 | 229-267 | 88899 |
| ***Codonellopsis*** |  |  |  | *R. quantula* | 39-50 | 155-173 | 55615 |
| *C. ecaudata* | 31-38 | 86-106 | 102841 | *Rhabdonellopsis* |  |  |  |
| *C. orthoceras* | 52-63 | 152-218 | 3963567 | *R. apophysata* | 47-59 | 264-325 | 89170 |
| *C. orientalis* | 30-37 | 74-81 | 78220 | ***Parundella*** |  |  |  |
| ***Dictyocysta*** |  |  |  | *P. inflata* | 23-29 | 91-113 | 32399 |
| *D. occidentalis* | 34-42 | 56-65 | 59781 | *P. praetenuis* | 32-37 | 114-127 | 30710 |
| *D. extensa* | 31-35 | 44-53 | 23334 | *P. aculeata* | 25-34 | 108-130 | 40434 |
| *D. reticulata* | 30-42 | 47-64 | 46280 | *P. difficilis* | 33-37 | 110-123 | 62347 |
| *D. entzi* | 33-40 | 47-51 | 31026 | *P. messinensis* | 46-47 | 148-152 | 175796 |
| *D. californiensis* | 30-35 | 46-52 | 25281 | *P. aciculifera* | 35-39 | 112-130 | 84489 |
| *D. minor* | 35-38 | 49-52 | 27576 | ***Xystonella*** |  |  |  |
| *D. polygonata* | 37-41 | 58-62 | 60608 | *X. treforti* | 73-82 | 349-466 | 619627 |
| *D. eleganslepida* | 32-40 | 47-66 | 40520 | *Xystonellopsis* |  |  |  |
| ***Climacocylis*** |  |  |  | *X. heroica* | 25-31 | 160-183 | 51910 |
| *C. scalaroides* | 29-35 | 111-203 | 73693 | *X. cymatica* | 42-49 | 190-220 | 210181 |
| *C. scalaria* | 37-68 | 205-300 | 433066 | *X. dahli* | 53-59 | 354-408 | 585757 |
| ***Helicostomella*** |  |  |  | *X. dicymatica* | 49-61 | 252-257 | 264375 |
| *H. subulata* | 13-16 | 375-562 | 846612 | *X. paradoxa* | 39-45 | 173-190 | 162533 |
| ***Metacylis*** |  |  |  | *X. tenuirostris* | 48-53 | 221-275 | 252599 |
| *M. corbula* | 28-36 | 39-51 | 39133 | *X. acuminata* | 58-63 | 355-399 | 652263 |
| *M. sanyahensis* | 22-30 | 22-31 | 13178 | ***Proplectella*** |  |  |  |
| ***Epoplocylis*** |  |  |  | *P. perpusilla* | 26-33 | 37-50 | 33433 |
| *E constricta* | 51-65 | 81-120 | 171697 | *P. ostenfeldi* | 26-31 | 43-51 | 29330 |
| *E pacifica* | 57-60 | 95-116 | 18889. | *P. claparedei* | 29-34 | 45-51 | 36713 |
| *E. blanda* | 63-70 | 124-145 | 295123 | *P. tenuis* | 35-43 | 55-71 | 81373 |
| *E. undella* | 60-72 | 107-133 | 241385 | *P. globosa* | 44-48 | 58-62 | 114915 |
| *E. labiosa* | 44-47 | 78-87 | 69864 | ***Undella*** |  |  |  |
| ***Epiplocyloides*** |  |  |  | *U. hemispherica* | 42-47 | 56-62 | 53741 |
| *E. reticulata* | 41-48 | 53-71 | 27276 | *U. turgida* | 25-36 | 25-41 | 9259 |
| *E. ralumensis* | 45-55 | 66-72 | 79362 | ***Daturella*** |  |  |  |
| ***Acanthostomella*** |  |  |  | *D. stramonium* | 73-84 | 316-376 | 560679 |
| *A obtusa* | 17-21 | 23-32 | 7137 | ***Eutintinnus*** |  |  |  |
| *A minutissima* | 16-26 | 24-31 | 9193 | *E. haslae* | 24-32 | 35-59 | 12507 |
| *A. conicoides* | 18-22 | 35-46 | 9128 | *E. apertus* | 24-36 | 57-107 | 31436 |
| *A. lata* | 23-30 | 29-40 | 21052 | *E. tubulosus* | 25-31 | 81-130 | 45664 |
| ***Ascampbelliella*** |  |  |  | *E. fraknoii* | 46-51 | 239-305 | 275993 |
| *A. armilla* | 19-24 | 25-33 | 9936 | *E. tenuis* | 35-45 | 180-228 | 170304 |
| *A. urceolata* | 21-32 | 31-45 | 7384 | *E. pinguis* | 40-50 | 141-180 | 161076 |
| *A. retusa* | 27-34 | 30-4 | 26029 | *E. exigua* | 31-37 | 134-173 | 133619 |
| ***Cyttarocylis*** |  |  |  | *E. macilentus* | 34-41 | 145-169 | 153401 |
| *C. eucecryphalus* | 109-119 | 114154 | 428068 | *E. stramentus* | 25-30 | 118-194 | 46572 |
| *C. brandti* | 94-107 | 92-120 | 359499 | *E. pacificus* | 25-29 | 66-84 | 28218 |
| *C. acutiformis* | 121-128 | 200-228 | 873483 | *E. birictus* | 41-59 | 271-350 | 491035 |
| ***Epirhabdonella*** |  |  |  | *E. perminutus* | 33-39 | 135-181 | 108999 |
| *E. mucronata* | 27-34 | 52-63 | 14481 | *Eutintinnus* spp. | 33-38 | 156-175 | 125019 |

Continued on the next page

| **Species** | **Trait of species** | | | **Species** | **Trait of species** | | |
| --- | --- | --- | --- | --- | --- | --- | --- |
| **Tintinnids** | **LOD** | **LL** | **AV** | **Heterotrophic dinoflagellates** | **ML** | **MW** | **AV** |
| ***Salpingacantha*** |  |  |  | *A. inflata* | 132-151 | 30-32 | 105773 |
| *S. unguiculata* | 11-17 | 158-189 | 19897 | *A. palaeotheroides* | 333-558 | 19-33 | 211089 |
| *S. ampla* | 22-29 | 243-388 | 109764 | *Amphisolenia* spp. | 489-534 | 12-26 | 104697 |
| ***Salpingella*** |  |  |  | ***Triposolenia*** |  |  |  |
| *S. acuminata* | 24-33 | 234-303 | 53325 | *T. bicornis* | 66-86 | 23-37 | 14692 |
| *S. subconica* | 15-23 | 161-225 | 35924 | ***Citharistes*** |  |  |  |
| *S. curta* | 10-14 | 81-107 | 8761 | *C. regius* | 30-44 | 25-32 | 14997 |
| *S. attenuata* | 26-32 | 252-293 | 39440 | ***Dinophysis*** |  |  |  |
| *S. decurtata* | 12-19 | 112-142 | 22215 | *D. exigua* | 25-31 | 21-27 | 7102 |
| *S. jugosa* | 44-57 | 313-446 | 175526 | *D. parvula* | 32-40 | 27-35 | 14391 |
| *S. gracilis* | 24-35 | 319-419 | 49655 | *D. doryphorum* | 53-70 | 50-63 | 76372 |
| *S. acuminatoides* | 10-17 | 220-270 | 16393 | *D. lativelata* | 25-35 | 23-35 | 11217 |
| *S. minutissima* | 24-30 | 80-143 | 22153 | *D. parva* | 25-30 | 21-30 | 7732 |
| *S. glockentogeri* | 25-34 | 275-390 | 45640 | *D. rotundata* | 39-50 | 31-44 | 24160 |
| ***Albatrossiella*** |  |  |  | *D. ovata* | 23-37 | 21-36 | 8300 |
| *A. agassizi* | 18-21 | 76-120 | 5066 | *D. schuettii* | 27-44 | 24-39 | 14154 |
| ***Amphorellopsis*** |  |  |  | *D. expulsa* | 36-66 | 33-55 | 27432 |
| *A. tropica* | 15-23 | 57-70 | 4134 | *D. pusilla* | 23-31 | 22-30 | 6137 |
| *A. quadrangula* | 19-33 | 62-86 | 11541 | *D. uracantha* | 30-67 | 30-59 | 26208 |
| *A. turbinea* | 19-23 | 70-83 | 9752 | *D. capitulata* | 32-45 | 29-37 | 14903 |
| *A. acuta* | 32-39 | 79-125 | 47830 | *D. mitra* | 42-56 | 37-50 | 27801 |
| ***Amphorides*** |  |  |  | *D. hastata* | 65-69 | 52-64 | 69325 |
| *A. quadrilineata* | 42-50 | 106-125 | 113914 | *D. cuneus* | 77-85 | 73-79 | 165943 |
| *A. minor* | 32-42 | 80-92 | 51331 | *D. reticulata* | 50-54 | 33-39 | 22750 |
| *A. brandti* | 36-43 | 108-118 | 82131 | *D. circumsuta* | 69-75 | 53-60 | 81893 |
| *A. amphora* | 35-44 | 92-109 | 53775 | *D. rapa* | 46-81 | 41-65 | 63512 |
| *Canthariella* |  |  |  | *D. brevisulcus* | 29-40 | 27-32 | 14831 |
| *C. brevis* | 24-30 | 47-57 | 13649 | *D. porodictyum* | 51-67 | 43-69 | 45617 |
| *C. truncata* | 26-31 | 45-54 | 15072 | *D. ellipsoidea* | 27-39 | 23-34 | 11817 |
| *C. pyramidata* | 24-31 | 48-57 | 17362 | *D. favus* | 40-60 | 36-49 | 32798 |
| ***Dadayiella*** |  |  |  | *D. ovum* | 30-39 | 28-34 | 32798 |
| *D. ganymedes* | 23-33 | 71-94 | 24880 | *D. acutoides* | 55-75 | 46-71 | 74632 |
| *D. cuspis* | 23-28 | 61-77 | 11295 | ***Ornithocercus*** |  |  |  |
| *D. pachytoecus* | 26-33 | 81-104 | 16204 | *O. quadratus* var.*quadratus* | 51-72 | 51-72 | 53741 |
| *D. bulbosa* | 24-33 | 71-89 | 25098 | *O. magnificus* | 33-42 | 33-42 | 13104 |
| *D. acutiformis* | 21-30 | 65-95 | 18872 | *O. heteroporus* | 28-38 | 28-38 | 8272 |
| ***Steenstrupiella*** |  |  |  | *O. thumii* | 47-62 | 47-62 | 37326 |
| *S. gracilis* | 28-34 | 61-80 | 22382 | *O. steinii* | 55-70 | 55-70 | 75228 |
| *S. steenstrupii* | 30-37 | 109-169 | 57651 | *O. quadratus* var*.simplex* | 44-47 | 44-47 | 24244 |
| *S. intumescens* | 34-38 | 188-241 | 74722 | ***Histioneis*** |  |  |  |
| *S. robusta* | 32-36 | 113-128 | 38976 | *H. cymbalaria* | 17-27 | 8-11 | 1121 |
| ***Brandtiella*** |  |  |  | *H. pieltainii* | 24-31 | 18-24 | 5714 |
| *B. palliata* | 43-53 | 117-156 | 284527 | *H. depressa* | 21-32 | 9-16 | 1653 |
| ***Ormosella*** |  |  |  | *H. dubia* | 14-22 | 13-20 | 2139 |
| *O. bresslaui* | 24-38 | 63-84 | 16183 | *H. cerasus* | 16-22 | 12-17 | 1930 |
| *O. apsteini* | 40-44 | 120-136 | 43763 | *H. biremis* | 43-52 | 25-29 | 18971 |
| ***Petalotricha*** |  |  |  | *H. parallela* | 16-26 | 16-21 | 3384 |
| *P. aperta* | 40-45 | 45-55 | 46496 | *H. gregoryi* | 16-28 | 14-21 | 2839 |
| **Heterotrophic dinoflagellates** | **ML** | **MW** | **AV** | *H. elongata* | 24-32 | 17-28 | 5999 |
| ***Prorocentrum*** |  |  |  | *H. para* | 21-27 | 22-24 | 5922 |
| *P. lenticulatum* | 22-34 | 24-36 | 10260 | *H. mitchellana* | 30-50 | 11-20 | 3044 |
| *P. compressum* | 32-43 | 29-38 | 16400 | *H. milneri* | 26-35 | 17-23 | 5518 |
| *P. micans* | 38-55 | 20-27 | 9742 | *H. hyalina* | 22-30 | 15-21 | 3944 |
| ***Amphisolenia*** |  |  |  | *H. crateriformis* | 21-27 | 22-24 | 5922 |
| *A. bidentata* | 515-927 | 9-25 | 150202 | *H. panda* | 25-28 | 10-13 | 1319 |
| *A. globifera* | 172-260 | 9-20 | 31389 | *H. cleaveri* | 19-24 | 9-10 | 909 |
| *A. schauinslandii* | 395-439 | 13-16 | 68824 | *H. schilleri* | 27-30 | 9-11 | 1477 |
| *A. astragalus* | 690-770 | 11-19 | 154373 | *H. carinata* | 39-43 | 19-23 | 10352 |

Continued on the next page

| **Species** | **Trait of species** | | | **Species** | **Trait of species** | | |
| --- | --- | --- | --- | --- | --- | --- | --- |
| **Heterotrophic dinoflagellates** | **ML** | **MW** | **AV** | **Heterotrophic dinoflagellates** | **ML** | **MW** | **AV** |
| *H. pulchra* | 47-52 | 18-29 | 11494 | *C. longissimum* | 629-801 | 43-79 | 155861 |
| *H. costata* | 30-34 | 22-27 | 9324 | *C. pulchellum* | 281-306 | 50-53 | 82542 |
| ***Ceratium*** |  |  |  | *C. gravidum* | 320-334 | 51-53 | 1305465 |
| *C. teres* | 126-171 | 32-40 | 25796 | ***Gonyaulax*** |  |  |  |
| *C. trichoceros* | 221-402 | 31-44 | 31504 | *G. polygramma* | 43-61 | 26-45 | 17648 |
| *C. kofoidii* | 95-141 | 16-28 | 6045 | *G. turbynei* | 31-53 | 25-45 | 10782 |
| *C. declinatum* | 131-205 | 31-39 | 27098 | *G. minuta* | 25-34 | 16-25 | 2944 |
| *C. declinatum*  *var.angusticornum* | 150-171 | 33-38 | 28389 | *G. birostris* | 66-103 | 23-39 | 17276 |
| *C. declinatum var.brachiatum* | 155-189 | 36-40 | 34052 | *G. fusiformis* | 63-98 | 35-53 | 42656 |
| *C. horridum var.molle* | 123-265 | 29-42 | 21291 | *G. subulata* | 45-51 | 25-27 | 9156 |
| *C. fusus* | 363-580 | 16-26 | 38537 | *G. verior* | 37-45 | 27-36 | 10058 |
| *C. fusus var.seta* | 265-449 | 11-16 | 19646 | *G. hyalina* | 50-69 | 41-58 | 39335 |
| *C. breve* | 111-306 | 56-83 | 165343 | *G. digitale* | 44-47 | 30-33 | 12965 |
| *C. candelabrum* | 97-193 | 43-64 | 89382 | *G. macroporus* | 25-30 | 20-24 | 3419 |
| *C. candelabrum*  *var.depressum* | 101-283 | 65-70 | 182317 | *G. bruunii* | 25-41 | 21-33 | 6743 |
| *C. furca* | 122-142 | 29-36 | 24375 | *G. pavillardii* | 40-44 | 30-39 | 13569 |
| *C. furca var.eugrammum* | 76-101 | 19-34 | 14581 | *G. reticulata* | 37-41 | 29-36 | 10322 |
| *C. tripos var. semipulchellum* | 286-376 | 47-60 | 97929 | *G. pacifica* | 109-139 | 54-92 | 165659 |
| *C. pentagonum* | 130-323 | 30-61 | 53417 | *G. diegensis* | 60-68 | 43-46 | 37651 |
| *C. pentagonum var.subrobustum* | 120-363 | 80-93 | 342947 | *G. striata* | 30-39 | 22-35 | 6969 |
| *C. lunula* | 140-156 | 78-81 | 306334 | ***Ceratocorys*** |  |  |  |
| *C. horridum* | 204-255 | 40-43 | 48429 | *C. horrida* | 49-84 | 49-84 | 66148 |
| *C. horridum var.denticulatum* | 117-215 | 32-41 | 25893 | *C. gourretii* | 33-52 | 33-52 | 19497 |
| *C. horridum var.tenue* | 258-304 | 30-32 | 20299 | *C. bipes* | 63-69 | 63-69 | 85960 |
| *C. macroceros* | 289-355 | 57-63 | 146435 | *C. armata* | 52-81 | 52-81 | 76951 |
| *C. macroceros var.gallicum* | 293-547 | 43-47 | 54548 | ***Heterodinium*** |  |  |  |
| *C. pavillardii* | 428-670 | 69-81 | 307704 | *H. globosum* | 80-82 | 53-54 | 62568 |
| *C. digitatum* | 114-141 | 36-41 | 54847 | *H. murrayi* | 37-53 | 30-48 | 18543 |
| *C. euarcuatum* | 228-325 | 50-56 | 87855 | *H. blackmanii* | 130-133 | 60-66 | 142548 |
| *C. praelongum* | 153-180 | 38-43 | 56356 | *H. rigdeniae* | 100-136 | 69-96 | 195936 |
| *C. lineatum* | 120-144 | 30-35 | 20813 | ***Goniodoma*** |  |  |  |
| *C. contortum* | 212-253 | 62-67 | 156213 | *G. polyedricum* | 41-67 | 41-67 | 32700 |
| *C. contortum var.karstenii* | 186-463 | 89-101 | 502671 | ***Protoperidinium*** |  |  |  |
| *C. paradoxides* | 106-139 | 74-75 | 224888 | *P. tuba* | 16-26 | 16-26 | 5022 |
| *C. arietinum* | 203-288 | 40-47 | 49914 | *P. curvipes* | 31-51 | 31-51 | 29981 |
| *C. azoricum* | 87-105 | 37-46 | 41710 | *P. acutipes* | 56-92 | 53-90 | 81589 |
| *C. symmetricum*  *var.coarctatum* | 239-257 | 45-48 | 60708 | *P. pedunculatum* | 33-45 | 29-38 | 11627 |
| *C. svmmetricum*  *var.orthoceras* | 136-209 | 38-49 | 53549 | *P. sinaicum* | 27-34 | 27-32 | 6833 |
| *C. tripodioides* | 283-418 | 54-69 | 163514 | *P. diabolum* | 136-160 | 60-63 | 163053 |
| *C. setaceum* | 157-310 | 25-44 | 36447 | *P. elegans var.granulata* | 219-265 | 162-198 | 2051676 |
| *C. limulus* | 78-90 | 47-55 | 74421 | *P. mite* | 37-41 | 33-38 | 12861 |
| *C. vultur* | 502-590 | 65-67 | 299177 | *P. grande* | 130-136 | 100-102 | 370244 |
| *C. platycorne* | 177-301 | 39-47 | 51424 | *P. grani* | 55-78 | 47-61 | 47795 |
| *C. platycorne var.dilatatum* | 113-133 | 36-41 | 35794 | *P. brachypus* | 72-102 | 6698 | 14888 |
| *C. defexum* | 288-570 | 54-69 | 138279 | *P. pyrum* | 36-58 | 30-50 | 17149 |
| *C. contrarium* | 242-411 | 4553 | 8083 | *P. brochii* | 70-75 | 63-66 | 74776 |
| *C. incisum* | 95-107 | 23-26 | 46642 | *P. steinii* | 50-51 | 50-51 | 69421 |
| *C. ranipes* | 174-329 | 46-62 | 108691 | *P. corniculum* | 33-48 | 30-39 | 13453 |
| *C. axiale* | 244-289 | 47-52 | 74973 | *P. oceanicum* | 173-192 | 80-92 | 710979 |
| *C. gibberum var.dispar* | 215-309 | 54-82 | 162083 | *P. tenuissimum* | 55-88 | 21-35 | 17167 |
| *C. carriense* | 305-387 | 33-44 | 44089 | *P. murrayi* | 139-142 | 59-61 | 317334 |
| *C. carriense var.volans* | 466-566 | 60-65 | 180411 | *P. elegans* | 107-171 | 70-97 | 305874 |

Continued on the next page

| **Species** | **Trait of species** | | | **Species** | **Trait of species** | | |
| --- | --- | --- | --- | --- | --- | --- | --- |
| **Heterotrophic dinoflagellates** | **ML** | **MW** | **AV** | **Heterotrophic dinoflagellates** | **ML** | **MW** | **AV** |
| *P. curtipes* | 100-166 | 95-127 | 335552 | *P. bicorne* | 10-31 | 15-24 | 4558 |
| *P. conicum* | 87-108 | 80-87 | 174629 | *P. fusiformis f. bicornia* | 237-284 | 55-73 | 261504 |
| *P. cepa* | 37-41 | 33-38 | 12861 | *P. robusta* | 22-47 | 21-40 | 40487 |
| *P. ovum* | 43-67 | 37-51 | 24967 | *P. hamulus* | 268-316 | 47-52 | 464519 |
| ***Podolampas*** |  |  |  | *P. gerbautii* | 383-591 | 82-136 | 4857487 |
| *P. spinifera* | 68-119 | 13-24 | 22083 | *P. hamulus var.inaeaqualis* | 177-398 | 47-59 | 532310 |
| *P. palmipes* | 64-98 | 23-40 | 33730 | *P. rhomboids* | 241-417 | 48-101 | 305568 |
| *P. bipes* | 68-96 | 43-79 | 163728 | *P. hamulus*  *var.semicircularis* | 193-590 | 40-60 | 615623 |
| *P. elegans* | 72-102 | 38-48 | 122514 | ***Lingulodinium*** |  |  |  |
| *P. bipes var.reticulata* | 74-79 | 60-69 | 236791 | *L. polyedrum* | 28-41 | 28-41 | 20298 |
| ***Scrippsiella*** |  |  |  | ***Cladopyxis*** |  |  |  |
| *S. trochoidea* | 24-32 | 17-22 | 2965 | *C. brachiolata* | 17-29 | 17-29 | 7565 |
| ***Oxytoxum*** |  |  |  | ***Protoceratium*** |  |  |  |
| *O. scolopax* | 65-87 | 11-15 | 3142 | *P. areolatum* | 30-37 | 30-37 | 19499 |
| *O. elongatum* | 90-149 | 11-15 | 4886 | *P. spinulosum* | 48-62 | 48-62 | 87070 |
| *O. mitra* | 31-43 | 16-21 | 3621 | ***Palaeophalacroma*** |  |  |  |
| *O. turbo* | 45-62 | 14-20 | 4102 | *P. sphaericum* | 23-29 | 23-29 | 9380 |
| *O. sceptrum* | 42-64 | 13-19 | 3571 | **Sarcodines** | **ML** | **MW** | **AV** |
| *O. subulatum* | 62-106 | 21-31 | 11426 | **Radiolaria** |  |  |  |
| *O. parvum* | 40-50 | 11-15 | 1902 | *Eucyrtidium cienknowskii* | 87-145 | 60-98 | 196219 |
| *O. milneri* | 87-106 | 24-31 | 18487 | *Eusyringium siphonostoma* | 27-40 | / | 16829 |
| *O. crassum* | 22-27 | 15-20 | 2081 | *Calocyclas amiae* | 69-82 | 76-124 | 114945 |
| ***Corythodinium*** |  |  |  | *Anthocyrtidium cineraria* | 87-144 | 71-115 | 273031 |
| *C. constrictum* | 45-59 | 25-36 | 10803 | *Eucecryphalus gegenbauri* | 52-93 | 74-97 | 337845 |
| *C. tesselatum* | 41-66 | 24-36 | 11634 | **Foraminifera** |  |  |  |
| *C. reticulatum* | 37-66 | 24-37 | 9644 | *Globigerina calida* | 46-56 | / | 71483 |
| *C. carinatum* | 68-110 | 47-60 | 68549 | *Globigerina pumilio* | 73-86 | / | 332869 |
| *C. belgicae* | 37-66 | 24-30 | 9644 |  |  |  |  |
| *C. elegans* | 54-71 | 30-45 | 23560 |  |  |  |  |
| *C. curvicaudatum* | 32-36 | 23-26 | 5724 |  |  |  |  |
| ***Pyrocystis*** |  |  |  |  |  |  |  |
| *P. lunula* | 70-126 | 24-38 | 58594 |  |  |  |  |
| *P. elegans* | 117-383 | 41-97 | 655743 |  |  |  |  |
| *P. fusiformis* | 503-905 | 129-198 | 4149968 |  |  |  |  |
| *P. noctiluca* | 189-288 | 189-288 | 7026779 |  |  |  |  |
